# Supplementary material for: Computer-aided detection of arrhythmogenic sites in post-ischemic ventricular tachycardia
Source: Sci Rep. 2023 Apr 27;13:6906. doi: 10.1038/s41598-023-33866-w (PMC10140038; doi:10.1038/s41598-023-33866-w)
Supplement: Supplementary file 1 — Supplementary Tables. [file 41598_2023_33866_MOESM1_ESM.docx]

Supplementary Material of the article

“Computer-aided detection of arrhythmogenic sites in post-ischemic ventricular tachycardia”

Giulia Baldazzi1,2,†*, Marco Orrù1,2,†, Graziana Viola3, Danilo Pani1

1Medical Devices and Signal Processing (MeDSP) Lab, Department of Electrical and Electronic Engineering (DIEE), University of Cagliari, Cagliari, Italy

2Department of Informatics, Bioengineering, Robotics and Systems Engineering (DIBRIS), University of Genoa, Genoa, Italy

3Department of Cardiology, Santissima Annunziata Hospital, Sassari, Italy

*Correspondence:

Giulia Baldazzi, Ph.D.

giulia.baldazzi@unica.it

†These authors contributed equally to this work

**Supplementary Table S1.** Classification performance of the SVM model with different kernels.

Classification performance obtained by the SVM model with linear kernel, radial basis function (RBF) kernel, and with polynomial kernel of 2nd and 3rd order. For the 10-time 10-fold (10T10F) cross-validation, mean and standard error for all performance indexes and approaches are reported, being computed across the ten iterations cumulatively. Conversely, for the leave-one-subject-out (LoSo) cross-validation, a single cumulative value for each performance index and approach is provided. As can be seen, the 3rd-order polynomial kernel provided stable and high results in both cross-validations, and as such it has been chosen for the subsequent analysis.

|  |  | ACC [%] | TPR [%] | TNR [%] | FPR [%] | F1-score |
| --- | --- | --- | --- | --- | --- | --- |
| 10T10F | Linear | 87.0 ± 0.6 | 87.5 ± 0.6 | 86.5 ± 1.3 | 13.5 ± 1.3 | 0.87 ± 0.01 |
| RBF | 83.8 ± 0.7 | 98.5 ± 0.2 | 69.2 ± 1.3 | 30.8 ± 1.3 | 0.86 ± 0.01 |
| 2nd-order polynomial | 90.1 ± 0.8 | 89.8 ± 1.0 | 90.4 ± 1.4 | 9.6 ± 1.4 | 0.90 ± 0.01 |
| 3rd-order polynomial | 89.4 ± 1.4 | 89.3 ± 0.9 | 89.6 ± 2.7 | 10.4 ± 2.7 | 0.89 ± 0.01 |
| LoSo | Linear | 83.8 | 86.7 | 81.9 | 18.1 | 0.81 |
| RBF | 65.2 | 13.4 | 98.3 | 1.7 | 0.23 |
| 2nd-order polynomial | 72.0 | 74.1 | 70.6 | 29.4 | 0.67 |
| 3rd-order polynomial | 74.7 | 75.6 | 74.2 | 25.8 | 0.70 |

**Supplementary Table S2.** Classification performance of the KNN model with different numbers of neighbors.

Classification performance obtained by the KNN model with a number of neighbors (k) equal to 5, 10 and the square root of the numerosity of the samples constituting the training data (T). For the 10-time 10-fold (10T10F) cross-validation, mean and standard error for all performance indexes and approaches are reported, being computed across the ten iterations cumulatively. Conversely, for the leave-one-subject-out (LoSo) cross-validation, a single cumulative value for each performance index and approach is provided. As can be seen, a number of neighbors equal to 10 provided stable and high results in both cross-validations, and as such it has been chosen for the subsequent analysis.

|  |  | ACC [%] | TPR [%] | TNR [%] | FPR [%] | F1-score |
| --- | --- | --- | --- | --- | --- | --- |
| 10T10F | k = 5 | 90.3 ± 0.8 | 91.5 ± 0.8 | 89.1 ± 1.4 | 10.9 ± 1.4 | 0.90 ± 0.01 |
| k = 10 | 88.3 ± 0.9 | 93.0 ± 0.6 | 83.6 ± 1.5 | 16.4 ± 1.5 | 0.89 ± 0.01 |
| k = sqrt(T) | 86.4 ± 0.6 | 91.2 ± 0.5 | 81.5 ± 1.3 | 18.5 ± 1.3 | 0.87 ± 0.01 |
| LoSo | k = 5 | 78.8 | 77.5 | 79.6 | 20.4 | 0.74 |
| k = 10 | 80.2 | 80.1 | 80.2 | 19.8 | 0.76 |
| k = sqrt(T) | 81.4 | 79.9 | 82.3 | 17.7 | 0.77 |

**Supplementary Table S3.** Classification performance obtained in the 10-time 10-fold cross-validation by considering the five most relevant features.

Classification performance obtained by the SVM, KNN and ENS models in the 10-time 10-fold cross-validation by considering the five most relevant features. Mean and standard error for all performance indexes and approaches are reported, being computed across the ten iterations cumulatively.

|  | ACC [%] | TPR [%] | TNR [%] | FPR [%] | F1-score |
| --- | --- | --- | --- | --- | --- |
| SVM | 87.5 ± 0.7 | 88.9 ± 1.0 | 86.1 ± 1.5 | 13.9 ± 1.5 | 0.88 ± 0.01 |
| KNN | 87.8 ± 0.8 | 91.4 ± 0.7 | 84.2 ± 1.8 | 15.8 ± 1.8 | 0.88 ± 0.01 |
| ENS | 89.8 ± 0.9 | 90.0 ± 1.0 | 89.5 ± 1.0 | 10.5 ± 1.0 | 0.90 ± 0.01 |
